# Supplementary material
Source: HighWire-hosted journal article supplement (https://rapm.bmj.com/content/44/6/646)
Supplement: inline-supplementary-material-1 [file inline-supplementary-material-1.pdf]

**Table 7. Post hoc Analyses: Medication Quantification Scale Version III and Morphine Equivalents (mg) at Baseline, 48 Hours, 1 Month, 3 Months, and 6 Months in Patients with Hospital Anxiety and Depression Scale Scores of Less than 11**

|                                            | Control Group       | Treatment Group        | Median Difference (99% Confidence Interval) | <i>P</i> Value |
|--------------------------------------------|---------------------|------------------------|---------------------------------------------|----------------|
| <b>Baseline</b>                            |                     |                        |                                             |                |
| N                                          | 29                  | 32                     |                                             |                |
| Medication Quantification Scale Version II | 4<br>( 2 to 10 )    | 6.5<br>( 3 to 10 )     | -1<br>( -4 to 3 )                           | 0.509          |
| Morphine Equivalents (mg)                  | 0<br>( 0 to 0 )     | 0<br>( 0 to 0 )        | 0<br>( 0 to 0 )                             | 0.840          |
| <b>48 Hours</b>                            |                     |                        |                                             |                |
| N                                          | 27                  | 32                     |                                             |                |
| Medication Quantification Scale Version II | 34<br>(30 to 38)    | 33.5<br>(28 to 37)     | 1<br>( -4 to 7 )                            | 0.593          |
| Morphine Equivalents (mg)                  | 138<br>(110 to 328) | 178.5<br>(92.5 to 267) | 5<br>( -93 to 90 )                          | 0.913          |
| <b>1 Month</b>                             |                     |                        |                                             |                |
| N                                          | 27                  | 32                     |                                             |                |
| Medication Quantification Scale Version II | 5<br>( 0 to 9 )     | 7<br>( 3 to 7.5 )      | 0<br>( -3 to 4 )                            | 0.687          |
| Morphine Equivalents                       | 5<br>( 0 to 1 )     | 10<br>( 1 to 20 )      | -2<br>( -10 to 5 )                          | 0.301          |

|                |            |             |             |       |
|----------------|------------|-------------|-------------|-------|
| (mg)           |            |             |             |       |
| 3 Months       |            |             |             |       |
| N              | 27         | 32          |             |       |
| Medication     | 0          | 0           | 0           | 0.968 |
| Quantification | ( 0 to 6 ) | ( 0 to 4.5) | ( -2 to 2 ) |       |
| Scale Version  |            |             |             |       |
| III            |            |             |             |       |
| Morphine       | 0          | 0           | 0           | 0.826 |
| Equivalentents | ( 0 to 2 ) | ( 0 to 4 )  | ( 0 to 0 )  |       |
| (mg)           |            |             |             |       |
| 6 Months       |            |             |             |       |
| N              | 27         | 29          |             |       |
| Medication     | 0          | 0           | 0           | 0.813 |
| Quantification | ( 0 to 0 ) | ( 0 to 0 )  | ( 0 to 0 )  |       |
| Scale Version  |            |             |             |       |
| III            |            |             |             |       |
| Morphine       | 0          | 0           | 0           | 0.946 |
| Equivalentents | ( 0 to 0 ) | ( 0 to 0 )  | ( 0 to 0 )  |       |
| (mg)           |            |             |             |       |

---

Data are median (interquartile range).
