# Supplementary material
Source: HighWire-hosted journal article supplement (https://rapm.bmj.com/content/44/6/646)
Supplement: inline-supplementary-material-2 [file inline-supplementary-material-2.pdf]

**Table 8. Post hoc Analyses: Western Ontario and McMaster Universities Arthritis Index (WOMAC) at Baseline, 1 Month, 3 Months, and 6 Months in Patients with Hospital Anxiety and Depression Scale (HADS) Scores of Less than 11**

|                         | Control Group    | Treatment Group      | Median Difference (99% Confidence Interval) | <i>P</i> Value |
|-------------------------|------------------|----------------------|---------------------------------------------|----------------|
| <b>Baseline</b>         |                  |                      |                                             |                |
| N                       | 29               | 32                   |                                             |                |
| WOMAC Pain              | 8<br>( 6 to 10)  | 9.5<br>( 8 to 11.5)  | -1<br>( -4 to 1 )                           | 0.102          |
| WOMAC Stiffness         | 5<br>( 3 to 5)   | 5<br>( 3 to 6)       | 0<br>( -2 to 1 )                            | 0.578          |
| WOMAC Physical Function | 25<br>(12 to 33) | 26<br>(20.5 to 37)   | -4<br>(-13 to 4 )                           | 0.231          |
| WOMAC Score             | 40<br>(22 to 48) | 39.5<br>(32.5 to 52) | -6<br>(-17 to 5)                            | 0.209          |
| <b>1 Month</b>          |                  |                      |                                             |                |
| N                       | 27               | 32                   |                                             |                |
| WOMAC Pain              | 4<br>( 1 to 6 )  | 5.5<br>(3.5 to 8)    | -2<br>( -4 to 0 )                           | 0.042          |
| WOMAC Stiffness         | 2<br>( 2 to 3)   | 3<br>( 2 to 3)       | 0<br>( -1 to 0 )                            | 0.277          |
| WOMAC Physical Function | 8<br>( 4 to 12)  | 13<br>( 8 to 18.5)   | -4<br>(-10 to 1 )                           | 0.053          |
| WOMAC Score             | 13<br>( 8 to 22) | 21<br>(14 to 28)     | -6<br>(-14 to 2)                            | 0.047          |
| <b>3 Months</b>         |                  |                      |                                             |                |
| N                       | 27               | 29                   |                                             |                |
| WOMAC Pain              | 2                | 2                    | -1                                          | 0.164          |

|                |            |              |              |       |
|----------------|------------|--------------|--------------|-------|
|                | ( 0 to 4 ) | ( 1 to 5.5)  | ( -2 to 1 )  |       |
| WOMAC          | 2          | 2            | 0            | 0.798 |
| Stiffness      | ( 1 to 3 ) | ( 1 to 3 )   | ( -1 to 1 )  |       |
| WOMAC Physical | 3          | 6.5          | -3           | 0.069 |
| Function       | ( 0 to 12) | ( 4 to 13.5) | ( -7 to 2 )  |       |
| WOMAC Score    | 8          | 11.5         | -3           | 0.115 |
|                | ( 2 to 17) | ( 6 to 23.5) | ( -10 to 3 ) |       |
| 6 Months       |            |              |              |       |
| N              | 27         | 29           |              |       |
| WOMAC Pain     | 1          | 1            | 0            | 0.520 |
|                | ( 0 to 4 ) | ( 0 to 5)    | ( -2 to 1 )  |       |
| WOMAC          | 2          | 2            | 0            | 0.781 |
| Stiffness      | ( 0 to 4)  | ( 0 to 3)    | ( -1 to 1 )  |       |
| WOMAC Physical | 6          | 6            | -2           | 0.201 |
| Function       | ( 0 to 9)  | ( 2 to 11)   | ( -7 to 3 )  |       |
| WOMAC Score    | 9          | 9            | -2           | 0.349 |
|                | ( 1 to 14) | ( 4 to 20)   | ( -9 to 5 )  |       |

---

Data are median (interquartile range).
